# Supplementary material for: Life Cycle Risk Assessment Applied to Gaseous Emissions from Crumb Rubber Asphalt Pavement Construction
Source: MDPI journal article supplement (doi:10.3390/su14095716), 2022-05-09
Supplement: s1 [file s1]

**Supplementary material for**  
**Life Cycle Risk Assessment Applied to Gaseous Emissions from Crumb**  
**Rubber Asphalt Pavement Construction**

Maria Chiara Zanetti, Angela Farina

Table S1. Coefficients used to calculate the characterization factors (CF) for the human toxicity for the PAHs.

|                      | ED <sub>50</sub><br>(RfD) | ED <sub>50</sub><br>(SF) | EF<br>(RfD) | EF (SF) | FF    | XF        | CF (RfD)   | CF (SF)   |
|----------------------|---------------------------|--------------------------|-------------|---------|-------|-----------|------------|-----------|
| PAHs                 |                           |                          |             |         |       |           |            |           |
| Standard             |                           |                          |             |         |       |           |            |           |
| Benzo[b]fluoranthene |                           | 0.909                    |             | 0.550   | 0.048 | 7,200.000 |            | 189.874   |
| Benzo[a]pyrene       |                           | 0.091                    |             | 5.500   | 0.045 | 7,200.000 |            | 1,768.111 |
| Naphtalene           | 0.003                     | 2.941                    | 148.148     | 0.170   | 0.050 | 7,200.000 | 53,312.092 | 61.176    |
| Othres               | 0.056                     |                          | 8.880       |         | 0.047 | 7,200.000 | 2,998.679  |           |
| CR Gap graded        |                           |                          |             |         |       |           |            |           |
| Pyrene               | 0.003                     |                          | 148.148     |         | 0.045 | 7,200.000 | 48,268.114 |           |
| Benz[a]anthracene    | 0.000                     | 0.909                    |             | 0.550   | 0.045 | 7,200.000 |            | 178.211   |
| Benzo[b]fluoranthene | 0.000                     | 0.909                    |             | 0.550   | 0.049 | 7,200.000 |            | 193.856   |
| Benzo[ghi]perylene   | 0.003                     |                          | 148.148     |         | 0.041 | 7,200.000 | 43,815.718 |           |
| Naphtalene           | 0.003                     | 2.941                    | 148.148     | 0.170   | 0.050 | 7,200.000 | 53,312.092 | 61.176    |
| Others               | 0.056                     |                          | 8.880       |         | 0.046 | 7,200.000 | 2,942.179  |           |
| CR Dense graded      |                           |                          |             |         |       |           |            |           |
| Benzo[b]fluoranthene |                           | 0.909                    |             | 0.550   | 0.048 | 7,200.000 |            | 189.874   |
| Naphtalene           | 0.003                     | 2.941                    | 148.148     | 0.170   | 0.050 | 7,200.000 | 53,312.092 | 61.176    |
| Others               | 0.056                     |                          | 8.880       |         | 0.046 | 7,200.000 | 2,920.964  |           |

Table S2. Coefficients used to calculate the characterization factors (CF) for the human toxicity for the VOCs.

|                           | ED <sub>50</sub><br>(RfD) | ED <sub>50</sub><br>(SF) | EF<br>(RfD) | EF (SF) | FF    | XF        | CF (RfD)  | CF (SF) |
|---------------------------|---------------------------|--------------------------|-------------|---------|-------|-----------|-----------|---------|
| VOCs                      |                           |                          |             |         |       |           |           |         |
| Standard                  |                           |                          |             |         |       |           |           |         |
| Benzene                   | 0.034                     | 12.821                   | 14.815      | 0.039   | 0.054 | 7,200.000 | 5,715.073 | 15.045  |
| Toluene                   | 5.625                     |                          | 0.089       |         | 0.053 | 7,200.000 | 33.730    |         |
| ethylbenzene              | 1.125                     | 40.000                   | 0.444       | 0.013   | 0.052 | 7,200.000 | 167.992   | 4.725   |
| p-Xylene                  | 0.113                     |                          | 4.444       |         | 0.051 | 7,200.000 | 1,639.633 |         |
| Others                    | 1.122                     |                          | 0.446       |         | 0.050 | 7,200.000 | 160.470   |         |
| CR Gap graded             |                           |                          |             |         |       |           |           |         |
| Benzene                   | 0.034                     | 12.821                   | 14.815      | 0.039   | 0.054 | 7,200.000 | 5,715.073 | 15.045  |
| Toluene                   | 5.625                     |                          | 0.089       |         | 0.053 | 7,200.000 | 33.730    |         |
| ethylbenzene              | 1.125                     | 40.000                   | 0.444       | 0.013   | 0.052 | 7,200.000 | 167.992   | 4.725   |
| p-Xylene                  | 0.113                     |                          | 4.444       |         | 0.051 | 7,200.000 | 1,639.633 |         |
| Styrene                   |                           | 1.225                    |             | 0.408   | 0.045 | 7,200.000 |           | 131.477 |
| Benzene, 1,2,4-trichloro- |                           | 612.500                  |             | 0.001   | 0.054 | 7,200.000 |           | 0.316   |
| Others                    | 1.122                     |                          | 0.446       |         | 0.049 | 7,200.000 | 158.720   |         |
| CR Dense graded           |                           |                          |             |         |       |           |           |         |
| Benzene                   | 0.034                     | 12.821                   | 14.815      | 0.039   | 0.054 | 7,200.000 | 5,715.073 | 15.045  |
| Toluene                   | 5.625                     |                          | 0.089       |         | 0.053 | 7,200.000 | 33.730    |         |
| ethylbenzene              | 1.125                     | 40.000                   | 0.444       | 0.013   | 0.052 | 7,200.000 | 167.992   | 4.725   |
| p-Xylene                  | 0.113                     |                          | 4.444       |         | 0.051 | 7,200.000 | 1,639.633 |         |
| Benzene, 1,2,4-trichloro- |                           | 612.500                  |             | 0.001   | 0.054 | 7,200.000 |           | 0.316   |
| Others                    | 1.122                     |                          | 0.446       |         | 0.049 | 7,200.000 | 158.720   |         |

Table S3. Results of the life cycle and risk assessment implemented in the ILCD midpoint method.

| Impact category                            | Unit                    | Standard             | CR Gap               | CR Dense             |
|--------------------------------------------|-------------------------|----------------------|----------------------|----------------------|
| Ozone depletion                            | kg CFC-11 eq            | $4.5 \times 10^{-5}$ | $3.4 \times 10^{-5}$ | $3.5 \times 10^{-5}$ |
| Human toxicity, cancer effects             | CTU                     | $5.8 \times 10^{-4}$ | $4.0 \times 10^{-4}$ | $4.1 \times 10^{-4}$ |
| Human toxicity, non-cancer effects         | CTU                     | $1.4 \times 10^{-5}$ | $3.2 \times 10^{-5}$ | $3.3 \times 10^{-5}$ |
| Human toxicity_workers, cancer effects     | CTU                     | $1.2 \times 10^{-6}$ | $3.5 \times 10^{-6}$ | $1.0 \times 10^{-6}$ |
| Human toxicity_workers, non-cancer effects | CTU                     | $6.5 \times 10^{-4}$ | $8.1 \times 10^{-4}$ | $6.2 \times 10^{-4}$ |
| Particulate matter                         | kg PM2.5 eq             | $1.0 \times 10^{-1}$ | $8.9 \times 10^{-2}$ | $9.1 \times 10^{-2}$ |
| Photochemical ozone formation              | kg NMVOC eq             | $1.7 \times 10^0$    | $1.4 \times 10^0$    | $1.5 \times 10^0$    |
| Acidification                              | molc H <sup>+</sup> eq  | $1.6 \times 10^0$    | $1.3 \times 10^0$    | $1.3 \times 10^0$    |
| Terrestrial eutrophication                 | molc N eq               | $5.8 \times 10^0$    | $5.0 \times 10^0$    | $5.1 \times 10^0$    |
| Freshwater eutrophication                  | kg P eq                 | $2.2 \times 10^{-2}$ | $1.3 \times 10^{-2}$ | $1.3 \times 10^{-2}$ |
| Marine eutrophication                      | kg N eq                 | $5.3 \times 10^{-1}$ | $4.6 \times 10^{-1}$ | $4.7 \times 10^{-1}$ |
| Freshwater ecotoxicity                     | CTUe                    | $5.8 \times 10^3$    | $4.0 \times 10^3$    | $4.1 \times 10^3$    |
| Land use                                   | kg C deficit            | $3.8 \times 10^3$    | $2.5 \times 10^3$    | $2.6 \times 10^3$    |
| Water resource depletion                   | m <sup>3</sup> water eq | $9.2 \times 10^{-2}$ | $6.0 \times 10^{-2}$ | $6.2 \times 10^{-2}$ |
| Mineral, fossil & ren resource depletion   | kg Sb eq                | $4.7 \times 10^{-8}$ | $3.7 \times 10^{-8}$ | $3.8 \times 10^{-8}$ |
